# Supplementary material for: Willingness to pay for an mHealth anti-retroviral therapy adherence and information tool: Transitioning to sustainability, Call for life randomised study experience in Uganda
Source: PubMed Central journal article supplement (PMC8882291; doi:10.1186/s12911-022-01782-0), 2022-02-26
Supplement: 12911_2022_1782_MOESM2_ESM.pdf [file 12911_2022_1782_MOESM2_ESM.pdf]

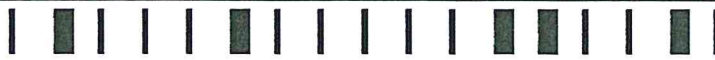

CALL4LIFE(068)

Willingness-1 (050)

Visit #   .

STUDY ID

-

WILLINGNESS FORM

2  0

Site # Subject ID #

dd

mm

yyyy

Clinic #:

Page 1 of 2

**Instructions: Please administer this questionnaire at the Month 18 study visit and 24 Month or at last study visit (Exit Visit)**

**A. Type of adherence support**

1. Having been on the C4L study, which arm of the study were you on?

Active arm (receiving C4L tool and standard of care)

Placebo (receiving Standard of Care)

**B. Choice for the adherence support**

2. Do you want the adherence support after the end of the study? (Chose one best one option)

Yes  No

2b. If Yes /No, why? \_\_\_\_\_

3. How do you wish the support to be offered? (Choose the best option)

Once a week

Once a day

Based on the pill reminder

On Clinic Visits

3b. For any options above, state the reason why \_\_\_\_\_

**C. Recommendation for the services**

4. Would you recommend the adherence support services to a colleague?

Yes  No

4b. If Yes / No, Why? \_\_\_\_\_

5. Would you recommend the Government/ Ministry of Health to adapt the services for?

Hypertensive Patients

Diabetic Patients

Patient on Tuberculosis treatment

Other \_\_\_\_\_

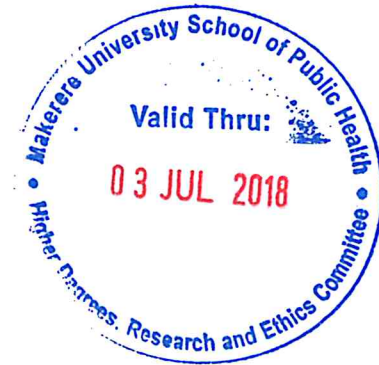

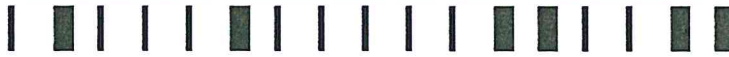

CALL4LIFE(068)

Willingness-2 (051)

STUDY ID

-

Site # Subject ID #

WILLINGNESS FORM

Clinic #:

Page 2 of 2

**D. Rating of the services**

6. which adherence support were you receiving? Choose all that apply

- IDI-PCT adherence support
- C4I-Study Team Adherence support
- C4L-Mobile Phone based adherence tool
- None (If none stop here)

7. With a scale of 1-5(5 Excellent, 1 Poor), how would you rate the adherence support you had past year

- 1:Poor
- 2:Fair
- 3:Good
- 4:Very good
- 5: Excellent

**E. Willingness to pay for adherence support**

8. If we offered everyone the tool but they had to pay for it, would you be willing to pay for the support.

- Yes  No

9. How much would you like to pay for the services.

State the amount \_\_\_\_\_

10. How often would you pay for the services

- Daily  Weekly
- Monthly  Yearly
- Other (Specify) \_\_\_\_\_

11. How would you like the payment to be?

- Through mobile money as a top up depending on how much I use it
- As a fixed monthly service fee deduction from airtime

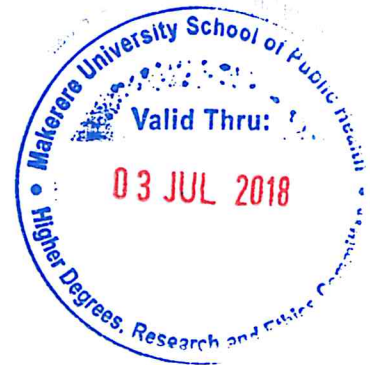

Patient Initials  
    
 First Middle Last
